# Supplementary material
Source: publisher figshare collection journal article supplement (https://karger.figshare.com/articles/dataset/_/4910579)
Supplement: Supplementary file 2 [file 1]

**Web-based Table 1.**

**Patient, lesion, and procedural characteristics of high-risk patients treated with Resolute Integrity ZES versus Promus Element EES**

|                                              | High-risk patients<br>n=957  |                          |      |
|----------------------------------------------|------------------------------|--------------------------|------|
| Patient characteristics                      | Resolute<br>Integrity<br>ZES | Promus<br>Element<br>EES | p    |
| Number of patients treated                   | 481                          | 476                      |      |
| Age (yrs)                                    | 67.6 ±10.5                   | 68.4 ±10.6               | 0.24 |
| Men                                          | 359 (74.6)                   | 323 (67.9)               | 0.02 |
| BMI (kg/m <sup>2</sup> )                     | 28.3 ±4.8                    | 28.2 ±4.4                | 0.87 |
| Diabetes mellitus                            | 167 (34.7)                   | 157 (33.0)               | 0.57 |
| Chronic renal failure                        | 35 (7.3)                     | 28 (5.9)                 | 0.39 |
| LVEF <30%                                    | 15 (3.1)                     | 13 (2.7)                 | 0.72 |
| Previous myocardial infarction               | 207 (43.0)                   | 190 (39.9)               | 0.33 |
| Previous percutaneous coronary intervention  | 182 (37.8)                   | 167 (35.1)               | 0.38 |
| Previous coronary artery bypass grafting     | 84 (17.5)                    | 89 (18.7)                | 0.62 |
| Clinical syndrome at presentation            |                              |                          | 0.52 |
| Stable angina pectoris                       | 216 (44.9)                   | 223 (46.8)               |      |
| Unstable angina pectoris                     | 65 (13.5)                    | 75 (15.8)                |      |
| Non-ST-elevation myocardial infarction       | 141 (29.3)                   | 129 (27.1)               |      |
| ST-elevation myocardial infarction           | 59 (12.3)                    | 49 (10.3)                |      |
| <b>Lesion and procedural characteristics</b> |                              |                          |      |
| Multivessel treatment                        | 97 (20.2)                    | 82 (17.2)                | 0.24 |
| Treated vessel                               |                              |                          |      |
| Left main                                    | 16 (3.3)                     | 17 (3.6)                 | 0.84 |
| Right coronary artery                        | 177 (36.8)                   | 170 (35.7)               | 0.73 |
| Left anterior descending artery              | 229 (47.6)                   | 208 (43.7)               | 0.22 |
| Circumflex artery                            | 146 (30.4)                   | 140 (29.4)               | 0.75 |
| Graft                                        | 23 (4.8)                     | 31 (6.5)                 | 0.25 |
| De novo lesion                               | 412 (85.7)                   | 400 (84.0)               | 0.48 |
| Reference vessel diameter pre PCI (mm)       | 2.67 ±0.60                   | 2.71 ±0.59               | 0.39 |

|                                     |                  |                  |      |
|-------------------------------------|------------------|------------------|------|
| Diameter stenosis pre PCI (%)       | 66.2 (54.9-77.1) | 65.1 (54.4-74.8) | 0.18 |
| Number of stents per patient        | 2.0 (1.0-2.0)    | 1.0 (1.0-2.0)    | 0.99 |
| Total stent length per patient (mm) | 30.0 (18.0-52.0) | 32.0 (20.0-54.0) | 0.28 |
| Postdilation                        | 376 (78.2)       | 391 (82.1)       | 0.12 |
| Diameter stenosis post PCI (%)      | 15.1 (10.8-20.9) | 15.1 (10.2-21.0) | 0.94 |

Values are n (%), mean±SD, or median (IQR). \*n=393; †n=391; Abbreviations: EES: everolimus-eluting stent; LVEF: left ventricular ejection fraction; ZES: zotarolimus-eluting stent.
