# Supplementary material
Source: publisher figshare collection journal article supplement (https://karger.figshare.com/articles/dataset/_/4910579)

**Figure 1.** Trial profile

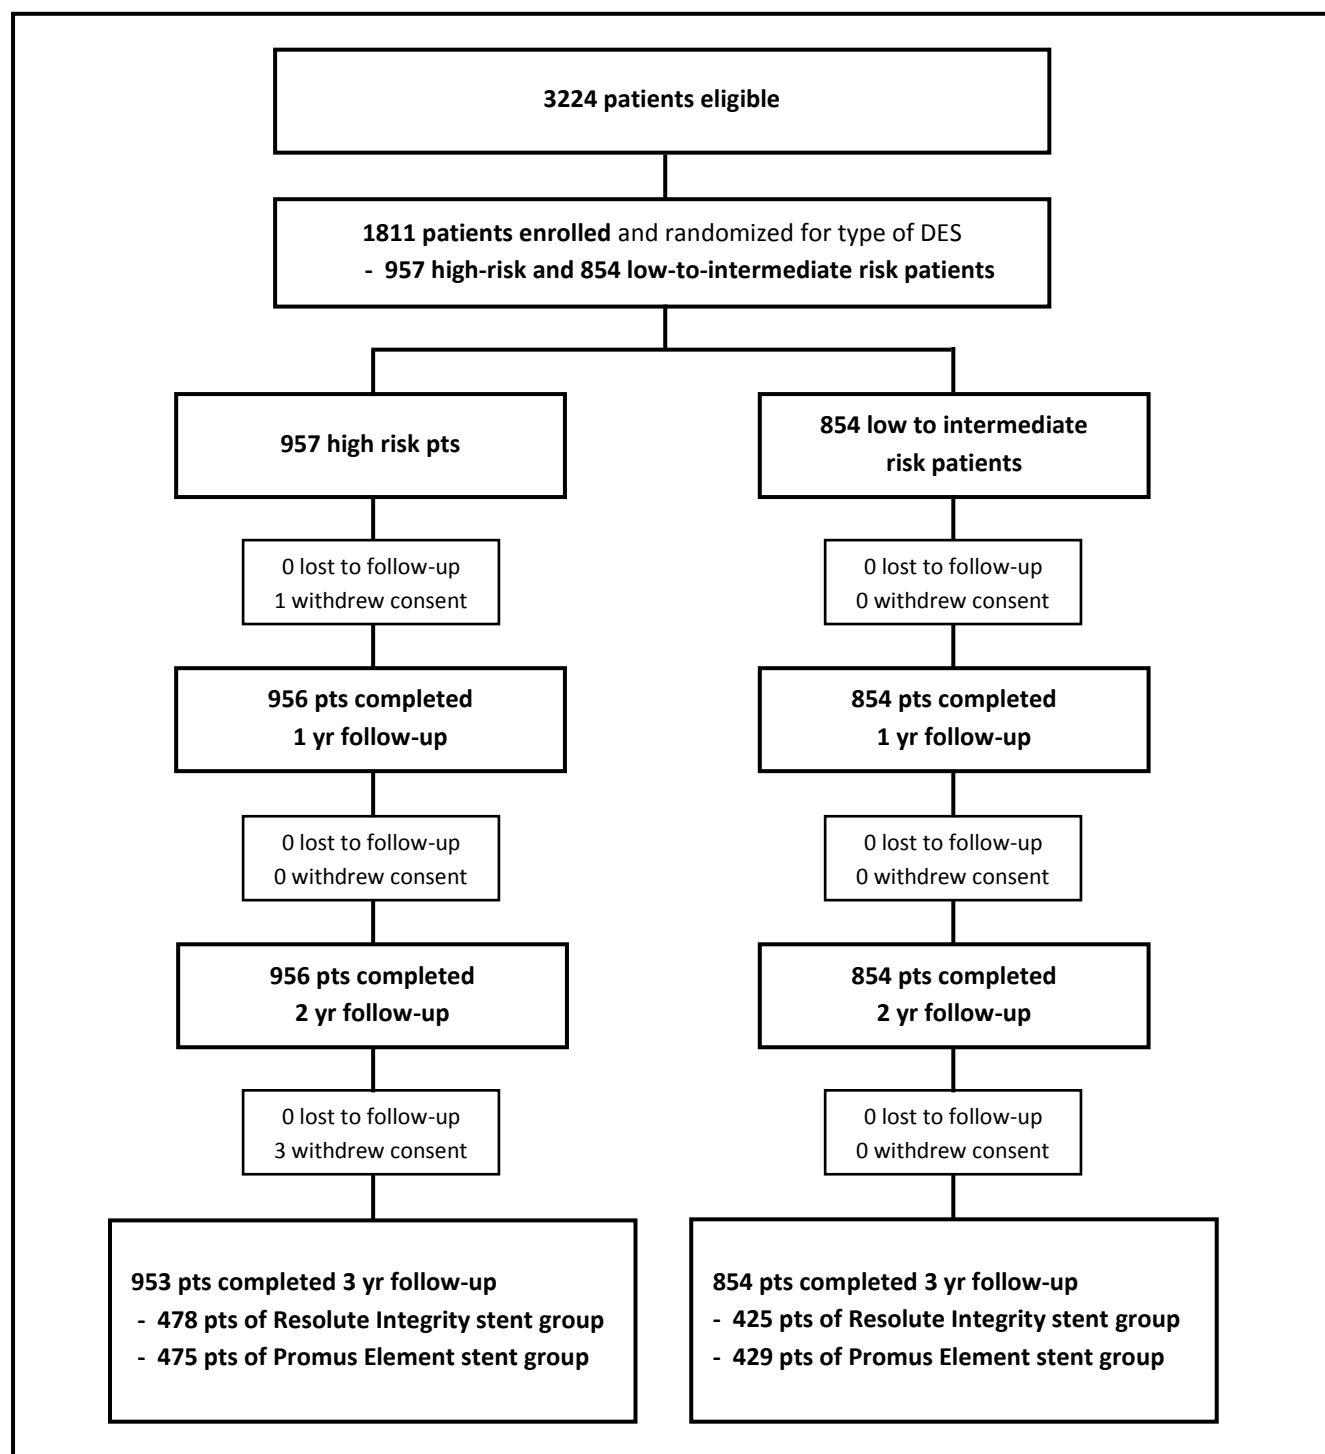

Abbreviations: pts: patients, yr: year.

Supplement: Supplementary file 1 [file 1]
